# Supplementary figures and images for: Synergistic impact of irrigation regimes and agro-ecological nutrient management practices on rice yield and water use efficiency in inland valleys.
Source: Research Square preprint supplement (doi:10.21203/rs.3.rs-6155212/v1), 2025-03-25

Annex 1: Percolation and ETa


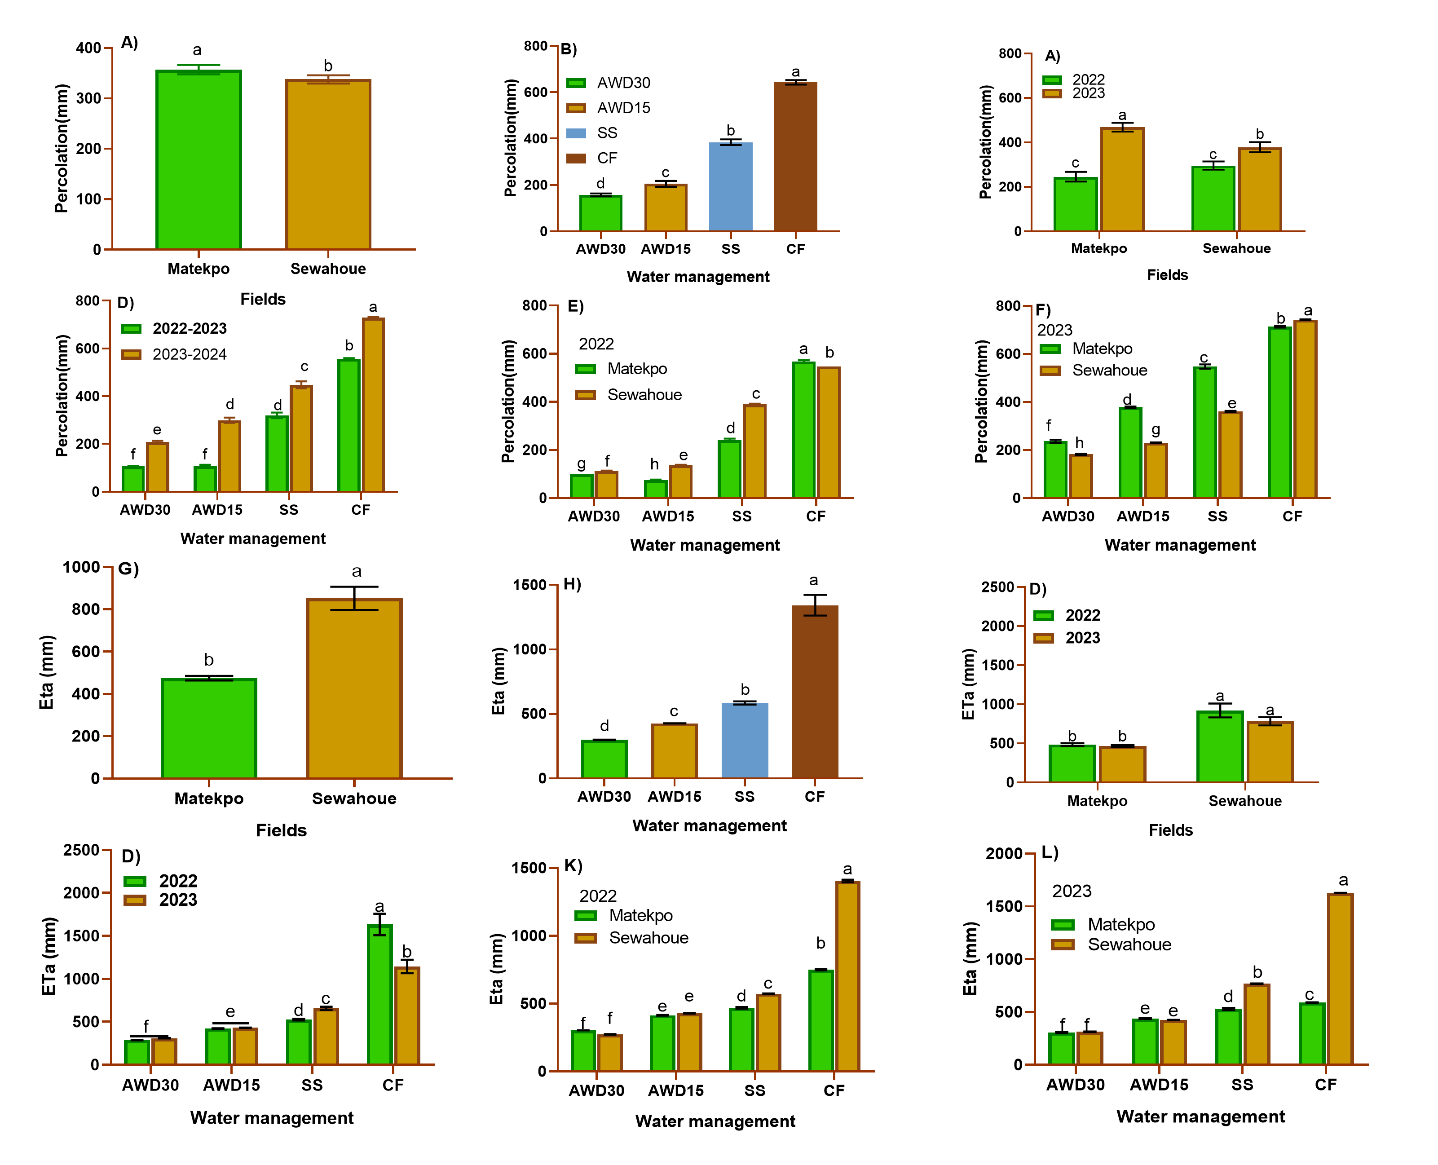


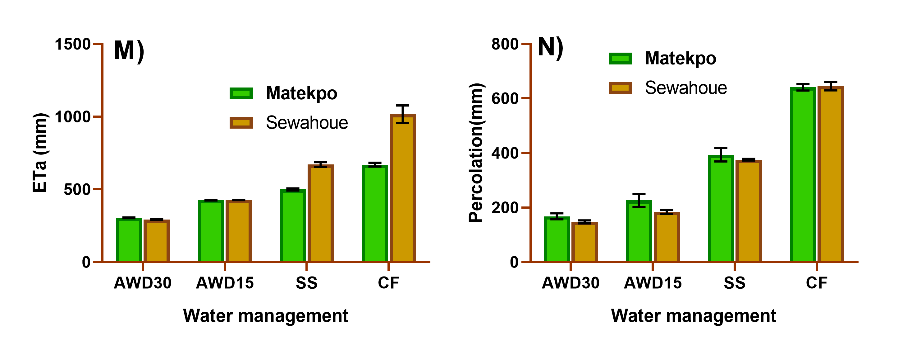


Annex 2: Rice yield


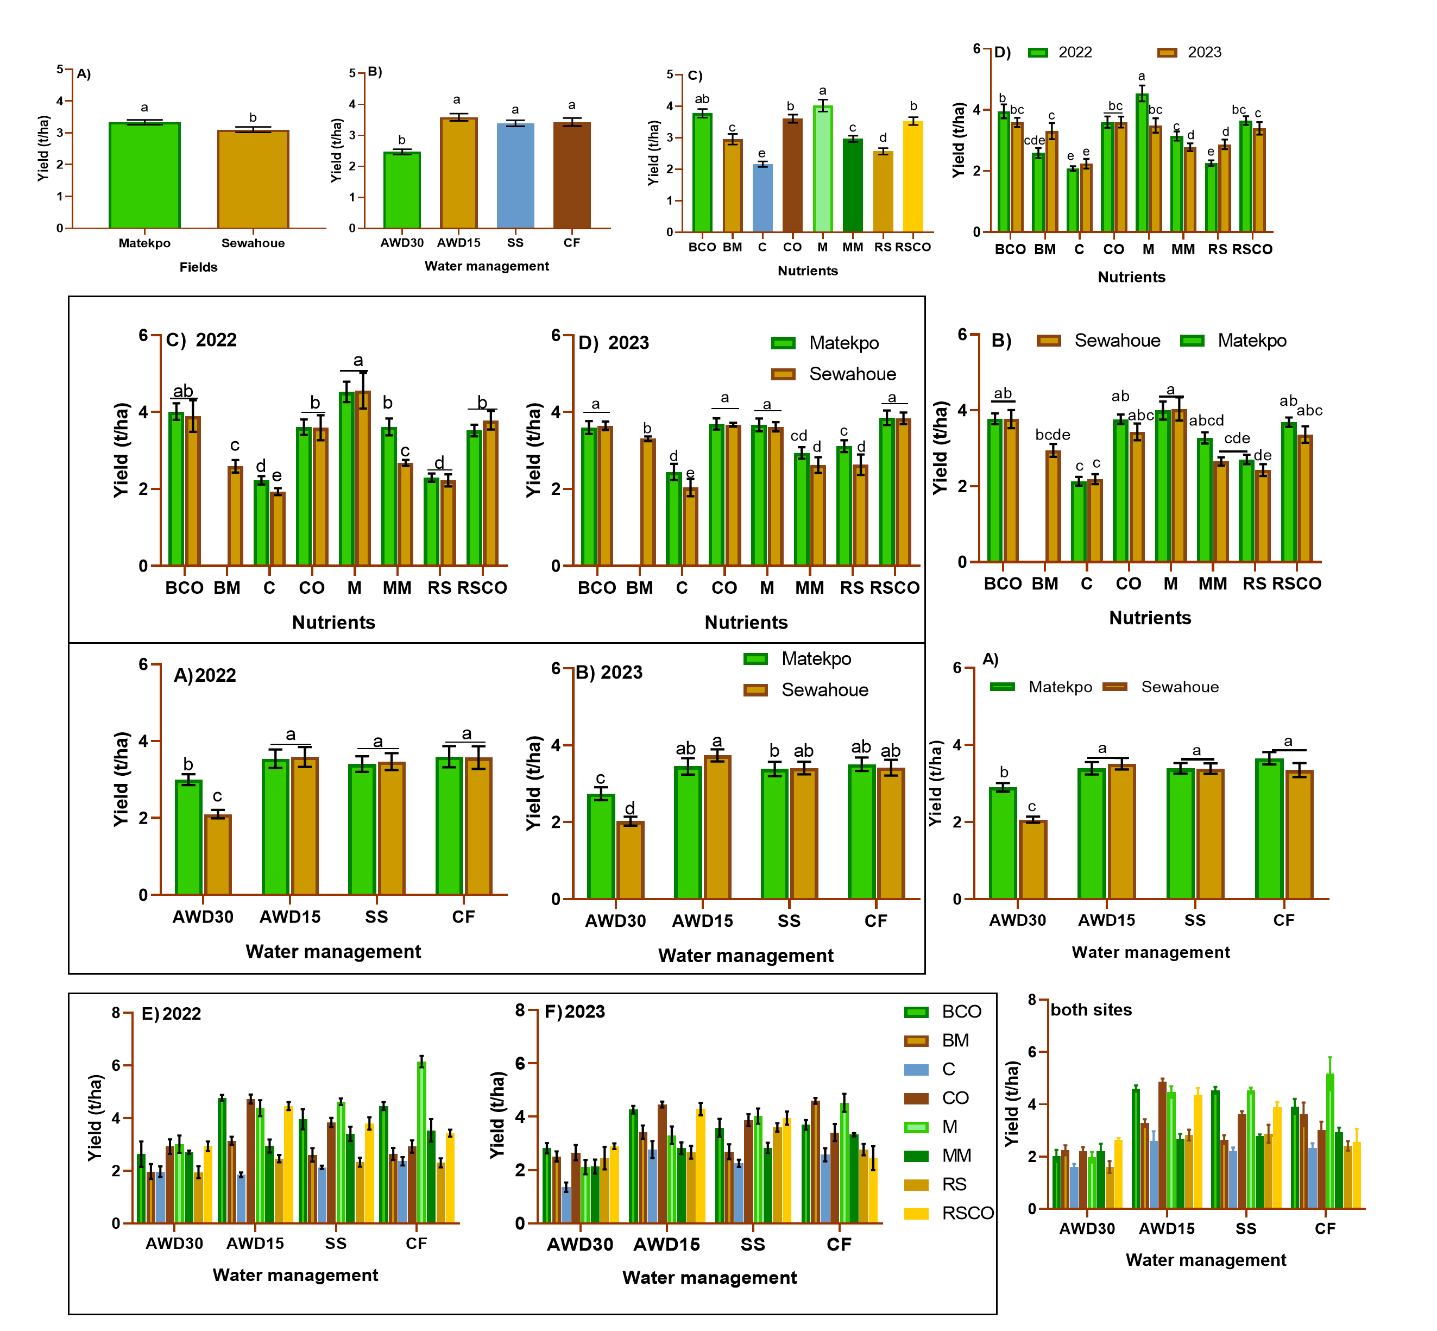


Annex 3: Water Use efficiency


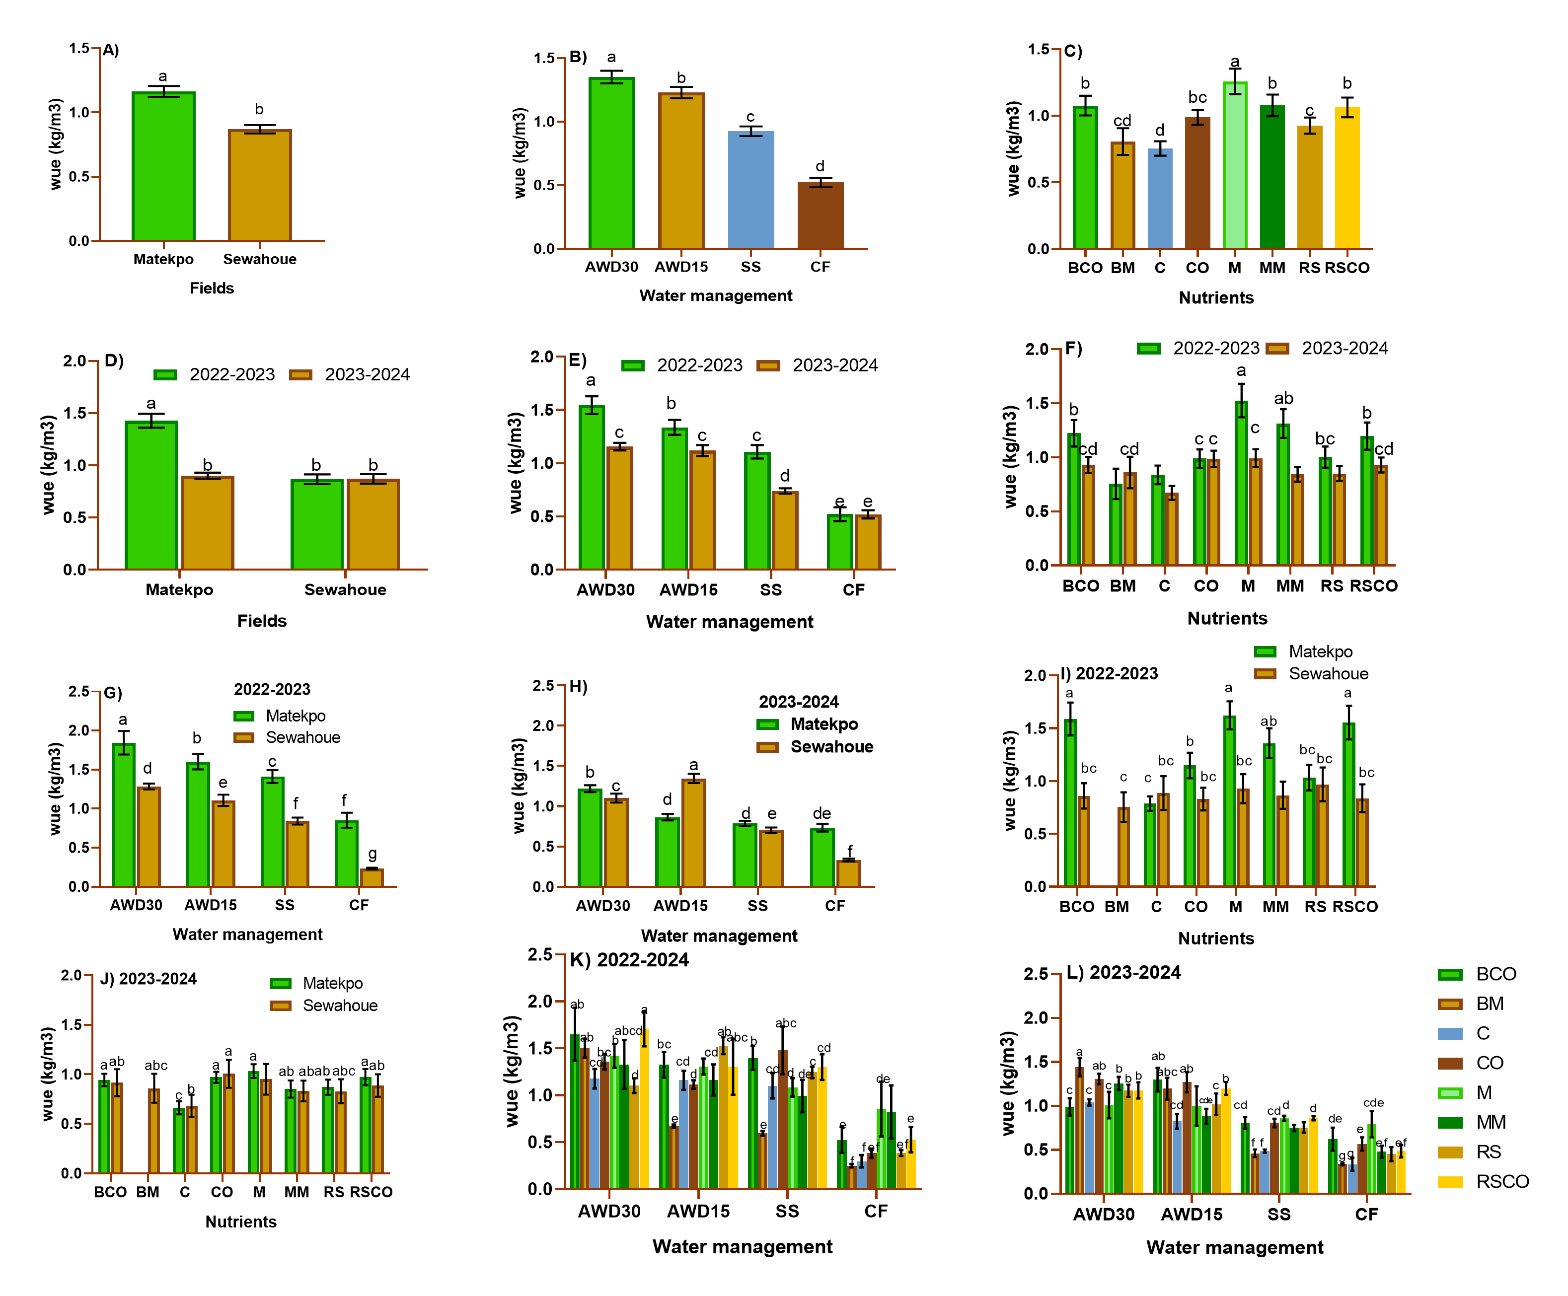

Supplement: Supplementary file 1 [file 20d93e61f1401c1e8a43658d.docx]
